# Supplementary material for: Adverse Events during Vitrectomy under Adequacy of Anesthesia—An Additional Report
Source: MDPI journal article supplement (doi:10.3390/jcm10184172), 2021-09-15
Supplement: s1 [file s1]

**Table S1.** Anthropometric data of patients in studied groups. Table modified from our previous work [24].

| Anthropometric Data                 |                      | Total<br>N = 175 (100)   | GA Group<br>N = 35 (20)  | M Group<br>N = 35 (20)   | P Group<br>N = 35 (20)   | PBB Group<br>N = 35 (20) | T Group<br>N = 35 (20)   | p-Value               |
|-------------------------------------|----------------------|--------------------------|--------------------------|--------------------------|--------------------------|--------------------------|--------------------------|-----------------------|
| Age X ± S/M<br>(R <sub>k</sub> )    | [years]              | 64.5 ± 11.7<br>66 (13)   | 65.1 ± 10.8<br>67 (9)    | 61.9 ± 11.9<br>63 (14)   | 66.1 ± 9.9<br>67 (8)     | 66.8 ± 12.1<br>69 (13)   | 62.7 ± 13.3<br>65 (14)   | p = 0.25<br>NS        |
|                                     | female               | 97 (55.4)                | 18 (51.4)                | 15 (42.9)                | 24 (68.6)                | 21 (60)                  | 19 (54.3)                | p = 0.26              |
| Gender n (%)                        | male                 | 78 (44.6)                | 17 (48.6)                | 20 (57.1)                | 11 (31.4)                | 14 (40)                  | 16 (45.7)                | NS                    |
| Height X ±<br>S/M (R <sub>k</sub> ) | [cm]                 | 165.8 ± 8.7<br>165 (12)  | 166.9 ± 8.6<br>168 (14)  | 168 ± 7.4<br>170 (14)    | 163.4 ± 8.7<br>160 (12)  | 165.9 ± 8.3<br>164 (12)  | 164.7 ± 10.3<br>164 (18) | p = 0.18<br>NS        |
| Weight X ±<br>S/M (R <sub>k</sub> ) | [kg]                 | 77.6 ± 15.9<br>75.5 (17) | 83.4 ± 19.8<br>82 (20)   | 74.7 ± 14.9<br>74 (19)   | 74.1 ± 13.3<br>74 (22)   | 78.8 ± 16<br>75 (11)     | 77.1 ± 13.7<br>80 (21)   | p = 0.19<br>NS        |
| BMI X ± S/M<br>(R <sub>k</sub> )    | [kg/m <sup>2</sup> ] | 28.3 ± 5.4<br>27.5 (6.4) | 29.9 ± 6.6<br>28.4 (5.3) | 26.4 ± 4.6<br>25.3 (5.4) | 27.9 ± 5.3<br>27.6 (7.7) | 28.6 ± 5.1<br>27.1 (4.4) | 28.5 ± 4.9<br>28.4 (7.3) | p = 0.05              |
|                                     | norm                 | 50 (28.7)                | 5 (14.3)                 | 15 (42.9)                | 14 (40)                  | 7 (20)                   | 9 (25.7)                 | p < 0.05 <sup>A</sup> |
| BMI n (%)                           | overweight           | 72 (41.4)                | 18 (51.4)                | 13 (37.1)                | 9 (25.7)                 | 19 (55.9)                | 13 (37.1)                | p = 0.09<br>NS        |
|                                     | obesity              | 52 (29.9)                | 12 (34.3)                | 7 (20)                   | 12 (34.3)                | 8 (23.5)                 | 13 (37.1)                | p = 0.41<br>NS        |
| ASA scale                           | I                    | 14 (8)                   | 2 (5.71)                 | 2 (5.71)                 | 5 (14.28)                | 1 (2.86)                 | 4 (11.43)                | p = 0.983             |
|                                     | II                   | 122 (69.8)               | 25 (71.43)               | 25 (71.43)               | 21 (60)                  | 26 (74.29)               | 25 (71.43)               |                       |
|                                     | III                  | 39 (22.2)                | 8 (22.56)                | 8 (22.56)                | 9 (25.71)                | 8 (22.56)                | 6 (17.14)                |                       |

Results presented as mean ± SD and median (IQR) for quantitative variables and numbers (percentages) for nominal variables. *p*-values by the one-way ANOVA test for quantitative variables; *p*-values by the test for equality of proportions for nominal variables. Pairwise comparison of proportions: <sup>A</sup> Significant differences in percentages between the groups GA and M, P; Abbreviations: group GA—patients who received general anaesthesia; group M—patients who received PA using a single dose of 1 g of metamizole intravenously, 30 min before arrival at operating room; Group P—patients who received PA using a single dose of 1 g of acetaminophen intravenously, 30 min before arrival at operating room; Group PBB—including patients who received PBB using a mixture of 3.5 mL each of 2% lignocaine and 0.5% bupivacaine with Hamilton's technique, 1 min before induction of GA; Group T—patients who received preventive topical analgesia by triple instillation of 2% proparacaine; BMI—body mass index; ASA scale—American Society of Anaesthesiologists scale reflecting general patients' health condition, SD—standard deviation; IQR—interquartile range; NS – non-statistically significance (*p* > 0.05).
